# Supplementary material for: Automatic Prediction of Protein 3D Structures by Probabilistic Multi-template Homology Modeling
Source: PubMed Central journal article supplement (PMC4619893; doi:10.1371/journal.pcbi.1004343), 2015-10-23
Supplement: pcbi.1004343.s001.pdf [file pcbi.1004343.s001.pdf]

# Supplements: Probabilistic multi-template protein homology modeling

A. Meier, J. Soeding

## 1 Single template neural network

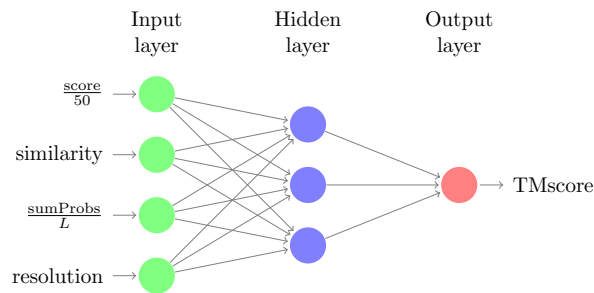

Supplemental Figure 1: Neural network for ranking templates. As input it gets four alignment features and it outputs a predicted TMscore which is then used to find the best template.

## 2 Sequence identity distribution

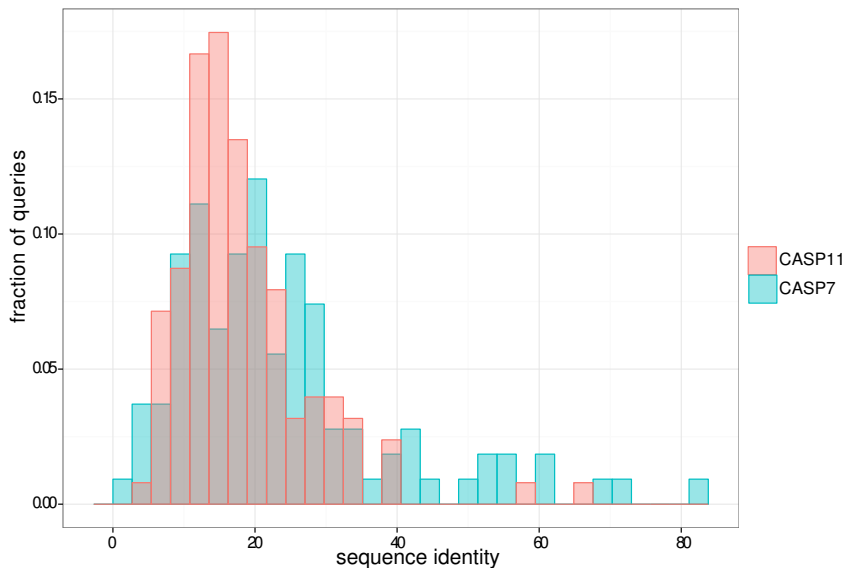

Supplemental Figure 2: Sequence identity histograms of CASP7 and CASP11 targets. The CASP7 distribution serves as a reference for the benchmark, training and optimization set, the CASP11 distribution is for comparison. In both cases around 80% of the targets have a sequence identity between 5 and 30%.

### 3 Multiple templates

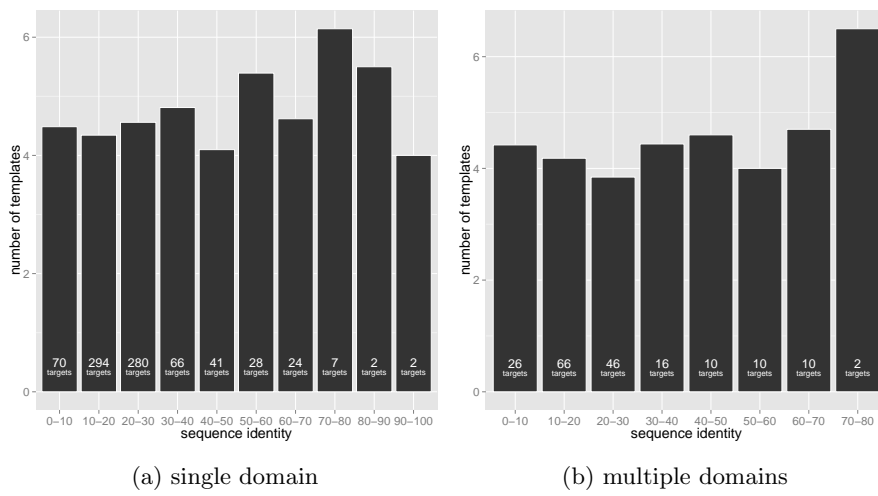

Supplemental Figure 3: Mean number of templates selected by probability based method as a function of sequence identity of the query  $q$  to the best template in its list  $tlis_t_q$ .

## 4 Additional scores

| Name      | Method    |                           |           | GDT-ha       | P-value  | GDT-TS       | GDC-all      | TM-score     | CAD[1]       |
|-----------|-----------|---------------------------|-----------|--------------|----------|--------------|--------------|--------------|--------------|
|           | Templates | Selection                 | Restrains |              |          |              |              |              |              |
| s.1st.old | Single    | first <b>hhsearch</b> hit | MODELLER  | 0.443        | -        | 0.614        | 51.88        | 0.684        | 0.572        |
| s.NN.old  | Single    | neural net                | MODELLER  | 0.447        | 1.47e-6  | 0.621        | 52.38        | 0.694        | 0.571        |
| s.NN.new  | Single    | neural net                | new       | 0.450        | 0.0008   | 0.623        | 52.79        | 0.698        | 0.575        |
| m.ss.old  | Multiple  | simple selection          | MODELLER  | 0.462        | 1.43e-10 | 0.632        | 53.51        | 0.703        | 0.575        |
| m.mt.old  | Multiple  | new multi-template        | MODELLER  | 0.480        | 2.2e-16  | 0.648        | 55.08        | 0.714        | 0.574        |
| m.mt.new  | Multiple  | new multi-template        | new       | <b>0.492</b> | 2.2e-16  | <b>0.660</b> | <b>56.30</b> | <b>0.725</b> | <b>0.583</b> |

Supplemental Table A: Extended version of Table 1 in the main text containing additional scores (GDT-TS, GDC-all, TM-score, CAD). Average scores for various variations of template selection strategies and restraints used with MODELLER on a test set of 1000 single and multi domain proteins in the pdb20 database. P-values (wrt GDT-ha) are calculated based on a two-sided paired t-test with respect to the previous line. According to Figure 2 in [1], the CAD score has a more limited range than the other scores, which might explain its low variance within our benchmark.

## 5 Alignment features

Supplemental Table B: Alignment features: these features describe query-template alignments in quantitative numbers and help to rate the alignment quality. All are calculated either within HHSEARCH or based on its output.

| FEATURE                | DESCRIPTION                                                                                                                                                                                                                                                                                                                                                                                                                                                                                                                                                                                                                                                                                                                                                                                                     |
|------------------------|-----------------------------------------------------------------------------------------------------------------------------------------------------------------------------------------------------------------------------------------------------------------------------------------------------------------------------------------------------------------------------------------------------------------------------------------------------------------------------------------------------------------------------------------------------------------------------------------------------------------------------------------------------------------------------------------------------------------------------------------------------------------------------------------------------------------|
| Probability            | The Probability of a template to be a true positive. For the probability of being a true positive, the secondary structure score in column SS is taken into account, together with the raw score. True positives are defined to be either globally homologous or they are at least homologous in parts, and thereby locally similar in structure. More precisely, the latter criterion demands that the MAXSUB score between query and hit is at least 0.1. In almost all cases the structural similarity will be due to a global OR LOCAL homology between query and template.                                                                                                                                                                                                                                 |
| Sum of posteriors      | The sum of all posterior probabilities along the alignment $A$ between query $q$ and template $t$ , i.e. $\text{SoP} = \sum_{(q_i, t_{i'}) \in A} P(q_i \diamond t_{i'}   q, t),$ where $P(q_i \diamond t_{i'}   q, t)$ is the posterior probability of residues $i$ in the query and $i'$ in the template are correctly aligned. Since SoP is heavily length dependent, it is usually divided by the query length $ q $ .                                                                                                                                                                                                                                                                                                                                                                                      |
| Raw score              | The raw score is what comes out of the (Viterbi) HMM-HMM alignment excluding the secondary structure score. Informally speaking, it is the sum over the similarities of aligned profile columns minus the gap penalties.                                                                                                                                                                                                                                                                                                                                                                                                                                                                                                                                                                                        |
| Posterior of two pairs | We denote the posterior probability for two pairs of residues $(i, i')$ and $(j, j')$ ; $i < j$ , $i' < j'$ being aligned correctly as: $P(M_i^q \diamond M_{i'}^t, M_j^q \diamond M_{j'}^t   q, t) \quad (1)$ Due to the computational complexity to accurately calculate (1), we approximate it as: $P(M_i^q \diamond M_{i'}^t, M_j^q \diamond M_{j'}^t   q, t) \approx \begin{cases} \min\{P(M_i^q \diamond M_{i'}^t), P(M_j^q \diamond M_{j'}^t   q, t)\}, & \text{if } j - i = j' - i' \\ P(M_i^q \diamond M_{i'}^t) \cdot P(M_j^q \diamond M_{j'}^t   q, t), & \text{otherwise} \end{cases} \quad (2)$ I.e. when $(i, i')$ and $(j, j')$ lie on the same diagonal in the dynamic programming matrix, we use the minimum, and otherwise the positions are assumed to be independent and can be multiplied. |
| SS score               | The secondary structure score. This score tells you how well the PSIPRED-predicted (3-state) or actual DSSP-determined (8-state) secondary structure sequences agree with each other. PSIPRED confidence values are used in the scoring, low confidences getting less statistical weight.                                                                                                                                                                                                                                                                                                                                                                                                                                                                                                                       |
| Similarity             | The Similarity is the arithmetic mean of the substitution scores between the aligned residue pairs from the query and template.                                                                                                                                                                                                                                                                                                                                                                                                                                                                                                                                                                                                                                                                                 |

## 6 Determination of template weights

In the following, we describe how to calculate template weights given a tree that specifies the evolutionary relations between a query and templates and among all templates. We are interested in the distance between a given pair residues in the query,  $d_0$ , given the corresponding template distances  $d_1, \dots, d_K$  and the pairwise alignments of the query with each template. We assign each template a weight  $w_k$ ,  $k = 1, \dots, K$  ( $w_0 = 1$  for the query) that represents the influence of the leaf on the query. We model the distribution of  $d_0$  given by the left tree  $\mathcal{T}$  in Figure 4 as follows (see also in the main text):

$$\frac{P(d_0|d_1, \dots, d_K, w_1, \dots, w_K, \mathcal{T})}{P(d_0)} = \int \frac{P(d_0|d_h, w_0)}{P(d_0)} P(d_h|d_1, \dots, d_K, w_1, \dots, w_K, \mathcal{T}) d(d_h) \quad (3)$$

where

$$\begin{aligned} P(d_h|d_1, \dots, d_K, w_1, \dots, w_K, \mathcal{T}) &= \frac{P(d_1, \dots, d_K|d_h, w_1, \dots, w_K, \mathcal{T})P(d_h)}{P(d_h|d_1, \dots, d_K)} \\ &= \left( \frac{P(d_1|d_h, \tau_1)}{P(d_1)} \right)^{w_1} \cdot \dots \cdot \left( \frac{P(d_K|d_h, \tau_K)}{P(d_K)} \right)^{w_K} P(d_h) \end{aligned} \quad (4)$$

As mentioned in the main text, we assume a diffusive behaviour with variance proportional to time  $\tau_k$  (as given by the tree edge lengths):

$$\frac{P(d_k|d_h, \tau_k)}{P(d_k)} \underset{d_h, d_k}{\propto} \exp\left(-\frac{(d_h - d_k)^2}{\tau_k}\right) \quad \forall k = 0, \dots, K. \quad (5)$$

The times  $\tau_k$  are given by the UPGMA clustering. Then (3) becomes with respect to  $d_0$ :

$$\frac{P(d_0|d_1, \dots, d_K, w_1, \dots, w_K, \mathcal{T})}{P(d_0)} \propto \int \exp\left(-\sum_{k=0}^K \frac{w_k}{\tau_k} (d_h - d_k)^2\right) d(d_h) \quad (6)$$

The argument in the exponent can be transformed into a quadratic expression of  $d$ :

$$-\underbrace{\left(\sum_{k=0}^K \frac{w_k}{\tau_k}\right)}_{\frac{1}{\tau_{\min}}} d_h^2 + 2 \left(\sum_{k=0}^K \frac{w_k}{\tau_k} d_k\right) d_h - \sum_{k=0}^K \frac{w_k}{\tau_k} d_k^2 = -\frac{1}{\tau_{\min}} \left( d_h^2 - 2 \left(\sum_{k=0}^K u_k d_k\right) d_h + \sum_{k=0}^K u_k d_k^2 \right) \quad (7)$$

where we defined:

$$u_k := \frac{w_k/\tau_k}{\sum_{k'=0}^K \frac{w_{k'}}{\tau_{k'}}} = \frac{\tau_{\min}}{\tau_k} w_k \quad (8)$$

Completing the square in (7) gives:

$$-\frac{1}{\tau_{\min}} \left( \left( d_h - \sum_{k=0}^K u_k d_k \right)^2 - \left( \sum_{k=0}^K u_k d_k \right)^2 + \sum_{k=0}^K u_k d_k^2 \right) \quad (9)$$

When integrating over  $d_h$  (eq 6), the factor:

$$\exp \left[ -\frac{1}{\tau_{\min}} \left( \sum_{k=0}^K u_k d_k^2 - \left( \sum_{k=0}^K u_k d_k \right)^2 \right) \right] \quad (10)$$

can be pulled out of the integral (since it is independent of  $d_h$ ); the integral itself yields a constant that does not depend on  $d_0$ . Therefore:

$$\frac{P(d_0|d_1, \dots, d_K, w_1, \dots, w_K, \mathcal{T})}{P(d_0)} \underset{d_0}{\propto} \exp \left( -\frac{1}{\tau_{\min}} \left( \sum_{k=0}^K u_k d_k^2 - \left( \sum_{k=0}^K u_k d_k \right)^2 \right) \right) \quad (11)$$

Now, we want to find new weights  $w'_k$  such that (see Figure 4; this step describes the transition from the left tree to the right one):

$$\frac{P(d_0|d_1, \dots, d_K, w_1, \dots, w_K, \mathcal{T})}{P(d_0)} \stackrel{!}{\propto}_{d_0} \exp\left(-\sum_{k=1}^K \frac{w'_k}{\tau_0 + \tau_k} (d_0 - d_k)^2\right) \quad (12)$$

Here, the last step introduced new weights  $w'_k$  so that the template distances  $d_1, \dots, d_K$  become directly dependent on the query distance  $d_0$ . Now, an expression for  $w'_k$ ,  $k = 1, \dots, K$  must be found. We equate the arguments of the exp functions according to eqs. (11) and (12):

$$\sum_{k=0}^K u_k d_k^2 - \left(\sum_{k=0}^K u_k d_k\right)^2 = \tau_{\min} \sum_{k=1}^K \frac{w'_k}{\tau_0 + \tau_k} (d_0 - d_k)^2 + \text{const}(d_0) \quad (13)$$

We collect terms with equal powers of  $d_0$ :

$$(u_0 - u_0^2)d_0^2 - \left(2u_0 \sum_{k=1}^K u_k d_k\right) d_0 = \left(\tau_{\min} \sum_{k=1}^K \frac{w'_k}{\tau_0 + \tau_k}\right) d_0^2 - \left(2\tau_{\min} \sum_{k=1}^K \frac{w'_k}{\tau_0 + \tau_k} d_k\right) d_0 + \text{const}(d_0) \quad (14)$$

Equating coefficients in eq. (14) leads to:

$$\begin{aligned} u_0(1 - u_0) &= \tau_{\min} \sum_{k=1}^K \frac{w'_k}{\tau_0 + \tau_k} \\ \sum_{k=1}^K u_k d_k &= \frac{\tau_{\min}}{u_0} \sum_{k=1}^K \frac{w'_k}{\tau_0 + \tau_k} d_k \end{aligned} \quad (15)$$

We demand that the  $w'_k$  are proportional to the old weights  $w_k$ . Then the scaling factors result from equating all individual summands in eq. (15):

$$u_k = \frac{\tau_{\min} w'_k}{u_0(\tau_0 + \tau_k)} \quad \forall k = 1, \dots, K \quad (16)$$

and solving for  $w'_k$  gives:

$$w'_k = \frac{\frac{1}{\tau_0} + \frac{1}{\tau_k}}{\frac{1}{\tau_{\min}}} w_k \quad (17)$$

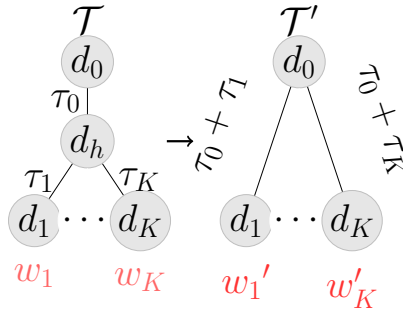

Supplemental Figure 4: Illustration of restructuring a given tree  $\mathcal{T}$  with an hidden node  $d_h$  (left) into one where  $d_1, \dots, d_K$  directly depend on  $d_0$  (right). This is done by integrating over  $d_h$  and finding appropriate weights  $w'_1, \dots, w'_K$  so that both trees describe the same distribution.  $t_1, \dots, t_K$  correspond to distances obtained by UPGMA clustering.

We apply formula (17) iteratively starting from a UPGMA tree rooted at the query until there is only the root node  $d_0$  and directly connected template nodes  $d_1, \dots, d_K$ , i.e. no more hidden nodes (see also main text). The final  $w_k^{\text{final}}$ ,  $k = 1, \dots, K$  are used as template weights.

## 7 Additional CASP9 and CASP10 results

Supplemental Table C: CASP9 overall results: official CASP9 results for all servers for both TBM and FM targets. The table is sorted with respect to the sum Z-score column. Time is given in mean minutes per target.

| rank | server              | dom | sum<br>Z-score | avg<br>Z-score | avg<br>GDT-TS | time [min] |
|------|---------------------|-----|----------------|----------------|---------------|------------|
| 1    | QUARK               | 147 | 115.788        | 0.788          | 62.675        | 3358.736   |
| 2    | Zhang-Server        | 147 | 113.242        | 0.77           | 62.765        | 3347.378   |
| 3    | RaptorX-MSA         | 147 | 103.27         | 0.703          | 61.774        | 3586.239   |
| 4    | RaptorX             | 147 | 103.01         | 0.701          | 61.731        | 3587.406   |
| 5    | RaptorX-Boost       | 147 | 99.845         | 0.679          | 61.453        | 3587.241   |
| 6    | HHpredB             | 147 | 93.104         | 0.633          | 59.528        | 4.334      |
| 7    | HHpredA             | 147 | 93.104         | 0.633          | 59.528        | 4.405      |
| 8    | HHpredC             | 147 | 91.821         | 0.625          | 59.361        | 4.398      |
| 9    | Seok-server         | 147 | 89.542         | 0.609          | 60.158        | 3735.85    |
| 10   | MULTICOM-CLUSTER    | 147 | 88.944         | 0.605          | 59.987        | 1030.446   |
| 11   | BAKER-ROSETTA       | 145 | 87.24          | 0.602          | 58.768        | 3518.86    |
| 12   | MULTICOM-REFINE     | 147 | 86.441         | 0.588          | 59.519        | 1030.697   |
| 13   | MULTICOM-NOVEL      | 147 | 82.825         | 0.563          | 59.371        | 1030.873   |
| 14   | gws                 | 145 | 82.645         | 0.57           | 58.931        | 4147.591   |
| 15   | chunk-TASSER        | 147 | 82.609         | 0.562          | 58.846        | 3220.107   |
| 16   | Phyre2              | 147 | 78.792         | 0.536          | 58.823        | 989.234    |
| 17   | MULTICOM-CONSTRUCT  | 147 | 76.446         | 0.52           | 58.703        | 1030.728   |
| 18   | pro-sp3-TASSER      | 147 | 75.358         | 0.513          | 58.117        | 3227.174   |
| 19   | MUFOLD-Server       | 147 | 68.676         | 0.467          | 56.26         | 3991.966   |
| 20   | FAMSD               | 147 | 68.669         | 0.467          | 57.295        | 624.882    |
| 21   | ZHOU-SPARKS-X       | 147 | 68.644         | 0.467          | 57.727        | 105.152    |
| 22   | JiangAssembly       | 146 | 68.195         | 0.467          | 56.999        | 1197.921   |
| 23   | Pcomb               | 142 | 64.774         | 0.456          | 57.809        | 1651.211   |
| 24   | PconsD              | 147 | 64.422         | 0.438          | 56.483        | 2454.316   |
| 25   | JiangTHREADER       | 146 | 64.206         | 0.44           | 57.096        | 1214.558   |
| 26   | SAM-T08-server      | 140 | 63.211         | 0.452          | 56.193        | 1102.817   |
| 27   | PconsM              | 143 | 63.133         | 0.441          | 57.598        | 1065.89    |
| 28   | Bilab-ENABLE        | 147 | 62.233         | 0.423          | 54.818        | 1106.28    |
| 29   | IntFOLD-TS          | 147 | 58.906         | 0.401          | 55.732        | 246.478    |
| 30   | prdos2              | 145 | 58.14          | 0.401          | 55.682        | 3690.435   |
| 31   | GSmetaserver        | 137 | 57.376         | 0.419          | 57.234        | 1184.296   |
| 32   | BioSerf             | 147 | 56.438         | 0.384          | 53.403        | 85.008     |
| 33   | Pcons               | 139 | 56.068         | 0.403          | 58.032        | 129.937    |
| 34   | ProQ2               | 141 | 55.475         | 0.393          | 56.205        | 1648.542   |
| 35   | CLEF-Server         | 147 | 55.266         | 0.376          | 55.543        | 928.274    |
| 36   | chuo-fams           | 147 | 54.884         | 0.373          | 55.173        | 876.997    |
| 37   | FALCON-SWIFT        | 147 | 54.55          | 0.371          | 55.223        | 863.763    |
| 38   | circle              | 134 | 53.942         | 0.403          | 57.968        | 2912.41    |
| 39   | MUFOLD-MD           | 145 | 53.183         | 0.367          | 51.588        | 3248.714   |
| 40   | 3D-JIGSAWV4-0       | 144 | 51.932         | 0.361          | 54.954        | 299.138    |
| 41   | FFAS03n             | 145 | 51.361         | 0.354          | 53.883        | 4.362      |
| 42   | ProfileCRF          | 147 | 51.054         | 0.347          | 54.144        | 660.07     |
| 43   | MidwayFoldingServer | 139 | 47.239         | 0.34           | 52.137        | 4417.612   |
| 44   | FFAS03              | 139 | 46.974         | 0.338          | 54.553        | 3.63       |
| 45   | PconsR              | 142 | 46.515         | 0.328          | 55.279        | 2602.051   |
| 46   | 3D-JIGSAWV4-5       | 140 | 46.238         | 0.33           | 54.617        | 472.421    |
| 47   | Atome2CBS           | 138 | 45.723         | 0.331          | 53.508        | 43.482     |
| 48   | PRECORS             | 140 | 45.272         | 0.323          | 52.051        | 3364.469   |
| 49   | Distill             | 147 | 45.181         | 0.307          | 53.183        | 139.991    |
| 50   | MUSTER              | 146 | 45.051         | 0.309          | 53.06         | 43.5       |
| 51   | FFAS03ss            | 140 | 42.915         | 0.307          | 53.905        | 4.664      |
| 52   | FFAS03a             | 141 | 42.615         | 0.302          | 54.028        | 4.843      |

|    |                |     |        |       |        |          |
|----|----------------|-----|--------|-------|--------|----------|
| 53 | Wolfson-serv   | 145 | 37.863 | 0.261 | 50.628 | 39.966   |
| 54 | LOPPAustin     | 130 | 36.934 | 0.284 | 55.738 | 159.893  |
| 55 | MUSICServer    | 141 | 35.939 | 0.255 | 44.402 | 4312.718 |
| 56 | ProQ           | 125 | 34.124 | 0.273 | 54.247 | 1644.804 |
| 57 | PROTAGORAS     | 122 | 33.636 | 0.276 | 53.326 | 132.509  |
| 58 | panther        | 116 | 32.811 | 0.283 | 52.586 | 405.392  |
| 59 | LMUserver      | 130 | 31.22  | 0.24  | 50.316 | 4382.261 |
| 60 | SAM-T02-server | 127 | 30.227 | 0.238 | 53.518 | 261.543  |
| 61 | YASARA         | 76  | 27.587 | 0.363 | 65.559 | 4393.479 |
| 62 | SAM-T06-server | 137 | 26.809 | 0.196 | 49.451 | 1048.062 |
| 63 | Ma-OPUS-server | 147 | 25.127 | 0.171 | 45.441 | 442.9    |
| 64 | FUGUEKM        | 131 | 23.52  | 0.18  | 50.935 | 26.127   |
| 65 | Pushchino      | 123 | 19.839 | 0.161 | 43.831 | 208.166  |
| 66 | m4t2009        | 61  | 19.551 | 0.321 | 65.033 | 93.125   |
| 67 | MUSICS-2S      | 115 | 13.623 | 0.118 | 42.488 | 4114.478 |
| 68 | RaptorX-FM     | 21  | 11.026 | 0.525 | 33.908 | 3601.972 |
| 69 | LenServer      | 126 | 8.831  | 0.07  | 24.987 | 3724.417 |
| 70 | RBO-PROTEUS    | 143 | 8.356  | 0.058 | 27.327 | 1045.136 |
| 71 | rehtnap        | 110 | 4.311  | 0.039 | 39.967 | 588.546  |
| 72 | STAT-PROTEUS   | 127 | 3.527  | 0.028 | 23.841 | 1255.585 |
| 73 | Yangkdd        | 125 | 2.203  | 0.018 | 27.353 | 1235.588 |
| 74 | ConStruct      | 109 | 1.647  | 0.015 | 20.172 | 1031.664 |
| 75 | BHAGEERATH     | 147 | 1.49   | 0.01  | 18.689 | 3761.989 |
| 76 | PLATO          | 111 | 1.422  | 0.013 | 19.647 | 1075.657 |
| 77 | schenk-torda   | 31  | 0      | 0     | 21.913 | 3082.077 |
| 78 | Fortmannserver | 11  | 0      | 0     | 11.537 | 4310.783 |
| 79 | PHAISTOSserver | 1   | 0      | 0     | 18.502 | 4265.172 |

Supplemental Table D: CASP10 overall results: official CASP10 results for all servers for both TBM and FM targets. The table is sorted with respect to the sum Z-score column. Time is given in mean minutes per target.

| rank | server             | dom | sum<br>Z-score | avg<br>Z-score | avg<br>GDT-TS | time [min] |
|------|--------------------|-----|----------------|----------------|---------------|------------|
| 1    | Zhang-Server       | 126 | 111.874        | 0.888          | 60.601        | 2457.093   |
| 2    | QUARK              | 126 | 105.531        | 0.838          | 60.204        | 2462.948   |
| 3    | BAKER-ROSETTA      | 126 | 87.787         | 0.697          | 57.542        | 2977.735   |
| 4    | RaptorX-ZY         | 126 | 85.964         | 0.682          | 58.43         | 4250.788   |
| 5    | RaptorX            | 126 | 82.911         | 0.658          | 58.055        | 3606.894   |
| 6    | TASSER-VMT         | 126 | 82.016         | 0.651          | 57.382        | 3307.054   |
| 7    | PMS                | 126 | 78.113         | 0.62           | 57.559        | 4378.698   |
| 8    | HHpred-thread      | 124 | 77.339         | 0.624          | 58.402        | 11.766     |
| 9    | HHpredA            | 126 | 76.748         | 0.609          | 57.563        | 6.486      |
| 10   | HHpredAQ           | 126 | 75.904         | 0.602          | 57.295        | 6.635      |
| 11   | PconsM             | 126 | 73.806         | 0.586          | 56.42         | 1492.026   |
| 12   | Pcons-net          | 125 | 72.226         | 0.578          | 55.072        | 1550.339   |
| 13   | chunk-TASSER       | 126 | 69.35          | 0.55           | 56.323        | 1615.115   |
| 14   | MULTICOM-REFINE    | 125 | 64.94          | 0.52           | 55.848        | 4.192      |
| 15   | MULTICOM-NOVEL     | 119 | 62.581         | 0.526          | 56.532        | 12.892     |
| 16   | MULTICOM-CLUSTER   | 126 | 62.192         | 0.494          | 55.92         | 325.825    |
| 17   | Mufold-MD          | 126 | 59.984         | 0.476          | 54.661        | 4323.788   |
| 18   | MUFOLD-Server      | 127 | 59.031         | 0.465          | 55.057        | 4385.074   |
| 19   | MULTICOM-CONSTRUCT | 121 | 56.558         | 0.467          | 53.665        | 39.283     |
| 20   | Phyre2A            | 126 | 53.903         | 0.428          | 54.419        | 1964.666   |
| 21   | ZHOU-SPARKS-X      | 126 | 50.963         | 0.404          | 53.774        | 34.305     |
| 22   | FALCON-TOPO        | 126 | 50.211         | 0.398          | 53.918        | 338.068    |
| 23   | FALCON-TOPO-X      | 126 | 49.897         | 0.396          | 53.429        | 338.186    |
| 24   | Seok-server        | 126 | 48.788         | 0.387          | 54.303        | 524.859    |
| 25   | PconsD             | 125 | 46.754         | 0.374          | 52.787        | 1465.628   |



|    |                    |     |        |       |        |          |
|----|--------------------|-----|--------|-------|--------|----------|
| 26 | SAM-T08-server     | 113 | 46.004 | 0.407 | 55.662 | 816.348  |
| 27 | Distill            | 126 | 41.665 | 0.331 | 53.195 | 47.894   |
| 28 | hGen3D             | 126 | 41.652 | 0.331 | 51.579 | 40.483   |
| 29 | NewSerf            | 126 | 38.303 | 0.304 | 51.341 | 70.537   |
| 30 | MUFoldCRF          | 122 | 37.536 | 0.308 | 49.915 | 4359.16  |
| 31 | IntFOLD2           | 126 | 37.447 | 0.297 | 51.66  | 347.904  |
| 32 | samcha-server      | 113 | 36.259 | 0.321 | 47.878 | 797.276  |
| 33 | 3D-JIGSAWV5-0      | 120 | 35.572 | 0.296 | 52.623 | 435.009  |
| 34 | Bilab-ENABLE       | 126 | 33.981 | 0.27  | 49.68  | 1392.564 |
| 35 | chuo-fams-server   | 126 | 33.567 | 0.266 | 52.385 | 4152.381 |
| 36 | FFAS03c            | 125 | 32.699 | 0.262 | 51.309 | 13.063   |
| 37 | slbio              | 118 | 32.017 | 0.271 | 51.111 | 4440.532 |
| 38 | FFAS03mt           | 112 | 31.849 | 0.284 | 54.496 | 12.874   |
| 39 | Distillroll        | 126 | 31.391 | 0.249 | 50.196 | 58.01    |
| 40 | Atome2CBS          | 111 | 29.897 | 0.269 | 52.219 | 69.422   |
| 41 | MATRIX             | 114 | 29.256 | 0.257 | 51.868 | 2992.605 |
| 42 | chuo-repack-server | 126 | 29.161 | 0.231 | 50.55  | 4403.425 |
| 43 | STRINGS            | 111 | 29.006 | 0.261 | 52.524 | 3046.083 |
| 44 | JiangServer        | 126 | 27.694 | 0.22  | 47.726 | 684.899  |
| 45 | IntFOLD            | 126 | 27.456 | 0.218 | 49.152 | 350.171  |
| 46 | FRESSserver        | 126 | 25.429 | 0.202 | 49.235 | 4461.935 |
| 47 | AOBA-server        | 124 | 25.163 | 0.203 | 49.258 | 4083.524 |
| 48 | FFAS03hj           | 112 | 24.636 | 0.22  | 53.387 | 16.303   |
| 49 | JiangFold          | 126 | 24.28  | 0.193 | 46.255 | 901.773  |
| 50 | JiangThreader      | 126 | 23.226 | 0.184 | 45.935 | 53.331   |
| 51 | YASARA             | 77  | 23.22  | 0.302 | 63.858 | 4346.388 |
| 52 | FFAS03             | 111 | 22.475 | 0.202 | 53.557 | 10.829   |
| 53 | UGACSBL            | 109 | 21.864 | 0.201 | 53.247 | 1632.667 |
| 54 | GSmetaserver       | 74  | 20.817 | 0.281 | 56.069 | 834.386  |
| 55 | SAM-T06-server     | 112 | 19.728 | 0.176 | 49.373 | 387.024  |
| 56 | BhageerathH        | 125 | 19.132 | 0.153 | 43.315 | 3751.958 |
| 57 | sysimm             | 62  | 17.655 | 0.285 | 55.967 | 642.096  |
| 58 | RBO-MBS            | 121 | 16.504 | 0.136 | 24.44  | 3494.306 |
| 59 | PROTAGORAS         | 100 | 15.66  | 0.157 | 53.795 | 366.478  |
| 60 | RaptorX-Roll       | 20  | 14.757 | 0.738 | 25.77  | 213.993  |
| 61 | RBO-i-MBS          | 121 | 14.243 | 0.118 | 24.634 | 3494.168 |
| 62 | panther            | 94  | 13.211 | 0.141 | 49.135 | 1635.295 |
| 63 | RBO-MBS-BB         | 121 | 9.749  | 0.081 | 25.484 | 3492.71  |
| 64 | RBO-i-MBS-BB       | 121 | 9.633  | 0.08  | 24.639 | 3493.005 |
| 65 | HOMER              | 93  | 5.569  | 0.06  | 41.815 | 166.603  |
| 66 | Lenserver          | 40  | 2.268  | 0.057 | 27.084 | 4232.178 |
| 67 | confuzz3d          | 46  | 0.676  | 0.015 | 22.026 | 3993.645 |
| 68 | confuzzGS          | 58  | 0.388  | 0.007 | 27.818 | 4025.334 |
| 69 | Bhageerath         | 5   | 0.185  | 0.037 | 40.766 | 3854.73  |

## References

- [1] Olechnovic, K. *et al.* (2013) CAD-score: a new contact area difference-based function for evaluation of protein structural models, *Proteins*, **81**, 149–62.
